# Supplementary material for: miR-199a and miR-497 Are Associated with Better Overall Survival due to Increased Chemosensitivity in Diffuse Large B-Cell Lymphoma Patients
Source: PubMed Central journal article supplement (PMC4581236; doi:10.3390/ijms160818077), 2015-08-05
Supplement: ijms-16-18077-s001.pdf [file ijms-16-18077-s001.pdf]

## Supplementary Information

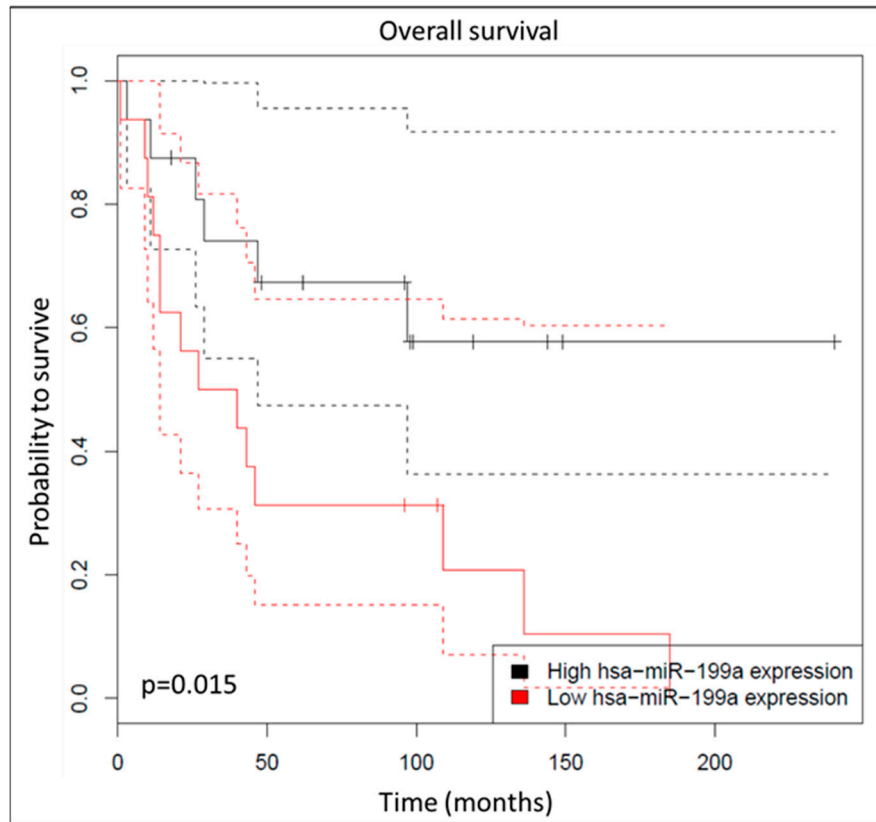

**Figure S1.** Kaplan Meier plot for overall survival in patients with DLBCL ( $n = 32$ ) stratified by miR-199a expression level in an analysis of a freely available data set recently published by Caramuta *et al.* [22].

**Table S1.** Drugs, Doses, and Source used in the study.

| Drug             | Doses (nM)                   | Source                                         |
|------------------|------------------------------|------------------------------------------------|
| Rituximab        | 0.1, 0.25, 0.5, 1            | Roche Austria GMBH, Vienna, Austria            |
| Cyclophosphamide | 1, 10, 25, 50                | Baxter Oncology GMBH, Halle, Germany           |
| Doxorubicin      | 0.01, 0.03, 0.05             | Pfizer Service Company BVBA, Zaventem, Belgium |
| Vincristin       | 0.0005, 0.001, 0.0025, 0.005 | Pfizer Italia S.R.L. Nerviano, Italy           |
